# Supplementary material for: Early detection and treatment of postpartum haemorrhage: a cost-effectiveness analysis of the E-MOTIVE trial
Source: bioRxiv or medRxiv preprint supplement (doi:10.1101/2024.01.11.23300121), 2024-01-12
Supplement: Supplementary file [file media-1.pdf]

## Supplementary Appendix

| Table A1. Unit Costs                     |        |         |              |          |                                                        |                                                                                                                                                                                                                |
|------------------------------------------|--------|---------|--------------|----------|--------------------------------------------------------|----------------------------------------------------------------------------------------------------------------------------------------------------------------------------------------------------------------|
| Item                                     | Kenya  | Nigeria | South Africa | Tanzania | Sources                                                | Other Information                                                                                                                                                                                              |
| Calibrated blood-collection drape*       | 1.52   | 1.52    | 1.52         | 1.52     | Personal communication with Excellent Fixable Drapes   | Per unit                                                                                                                                                                                                       |
| Oxytocin*                                | 1.25   | 1.25    | 1.25         | 1.25     | <sup>18</sup>                                          | Per patient. Cost includes oxytocin for initial infusion 10IU (0.42 USD) and maintenance infusion 20IU (0.84 USD).                                                                                             |
| Tranexamic acid (TXA) *                  | 2.74   | 2.74    | 2.74         | 2.74     | <sup>18</sup>                                          | Per 1g/10mL ampoule                                                                                                                                                                                            |
| Administration of TXA                    | 0.80   | 0.28    | -            | 0.28     | Personal communication with country TMGs               | Per procedure. Cost includes 10 minutes of midwife time for slow bolus injection.                                                                                                                              |
| Intravenous (IV) fluids*                 | 0.54   | 0.54    | 0.54         | 0.54     | <sup>19</sup>                                          | Per 500mL. Cost per mL is used across volumes.                                                                                                                                                                 |
| IV fluid giving set and cannula*         | 0.38   | 0.38    | 0.38         | 0.38     | <sup>26</sup>                                          | Per unit                                                                                                                                                                                                       |
| Ergometrine*                             | 0.73   | 0.73    | 0.73         | 0.73     | <sup>18</sup>                                          | Per 200 mcg/ml injection in 1mL ampoule                                                                                                                                                                        |
| Misoprostol*                             | 1.25   | 1.25    | 1.25         | 1.25     | <sup>18</sup>                                          | Per 800mcg (4 x 200mcg tablets)                                                                                                                                                                                |
| Hysterectomy                             | 185.21 | 258.86  | 1339.49      | 138.91   | <sup>24 4 25</sup>                                     | Per procedure                                                                                                                                                                                                  |
| Laparotomy                               | 148.17 | 207.09  | 1071.59      | 111.13   |                                                        | Per procedure. Cost is 80% of postpartum hysterectomy cost                                                                                                                                                     |
| Non-pneumatic anti-shock garment (NASG)* | 1.27   | 1.17    | 1.54         | 1.17     | <sup>26</sup>                                          | Per procedure, based on 72 uses of NASG.                                                                                                                                                                       |
| Bimanual compression                     | 2.40   | 0.85    | 6.35         | 0.86     | <sup>23</sup> Personal communication with country TMGs | Per procedure, Assumption: 30 minutes of midwife time                                                                                                                                                          |
| Uterine balloon tamponade (UBT)*         | 1.19   | 0.93    | 6.90         | 0.93     | <sup>26 27</sup>                                       | Per procedure. For Kenya, Nigeria, and Tanzania the cost includes the components of UBT device (condom, catheter and syringe) and 5 minutes of midwife time. For South Africa the cost includes Ellavi device. |
| Attending doctor for severe PPH          | 1.54   | 0.79    | 4.27         | 0.72     | <sup>23</sup> Personal communication with country TMGs | Per case of severe PPH. Cost is 10 minutes of doctor time                                                                                                                                                      |
| Non-ICU hospitalisation                  | 7.62   | 13.99   | 110.27       | 5.61     | <sup>22</sup>                                          | Per day in hospital. Cost estimates represent the hotel component of hospital costs, i.e., excluding the cost of drugs and diagnostic tests.                                                                   |
| ICU admission                            | 57.43  | 100.50  | 717.86       | 43.07    | <sup>28</sup>                                          | Per day in ICU                                                                                                                                                                                                 |
| Transfer to higher level facility        | 19.35  | 34.25   | 54.74        | 14.51    | <sup>24,25</sup>                                       | Per event                                                                                                                                                                                                      |
| Blood transfusion                        | 95.64  | 40.08   | 288.55       | 71.73    | <sup>4</sup>                                           | Per procedure. Cost assumes 2 units of whole blood were required for blood transfusions.                                                                                                                       |
| Needles and syringe*                     | 0.05   | 0.05    | 0.05         | 0.05     | <sup>26</sup>                                          | Per unit                                                                                                                                                                                                       |

\*Tradable goods were adjusted for shipping, handling, and internal distribution (+25%).

## Costing assumptions

Several simplifying assumptions were necessary to estimate unit costs in the analysis. These were based on expert clinical opinion from within the E-MOTIVE study team and findings from an observational study conducted alongside the trial. All assumptions were agreed prior to any analysis being undertaken.

- Staff time was only costed when additional labour was considered essential.
- For cases of *severe* PPH, it was assumed that a doctor would attend for 10 minutes. We considered the lowest appropriate grade doctor who could attend.
- To avoid zero costs, patients with a length of stay less than 24 hours were assigned the cost of a full day on the ward which can be considered as a proxy for the cost of delivery.
- Patients with an ICU length of stay less than 24 hours were assigned the cost of a full day in ICU.
- The duration of bimanual compression was assumed to be 30 minutes.
- Two units of whole blood were assumed to be required for those who needed blood transfusions.
- The cost of a cannula and an IV giving set were applied to half of the women who had IV PPH treatment, given observational findings showed that approximately 50% of patients had prior IV access.
- A one-off cost for syringes and needles for PPH treatment with oxytocin, TXA and ergometrine was applied.
- In the absence of robust costs for laparotomy across all countries, an assumed cost equivalent to 80% of a hysterectomy was applied.
- Uterine massage and examination of the genital tract were not assumed to bear an additional cost when delivered as part of the E-MOTIVE intervention. These aspects of the first-response treatment bundle were considered relevant to a reprioritisation of care and not additional care. It was expected to be delivered by the same attending midwife so extra resource would not be required.
- The costs of the uncalibrated drapes used by the usual-care group in the E-MOTIVE trial were not considered by this analysis as they were used for research purposes.

The importance of assumptions was explored using deterministic sensitivity analyses.

| To country:  | From country: |         |              |          |
|--------------|---------------|---------|--------------|----------|
|              | Kenya         | Nigeria | South Africa | Tanzania |
| Kenya        | 1.00          | 0.57    | 0.08         | 1.34     |
| Nigeria      | 1.77          | 1.00    | 0.14         | 2.37     |
| South Africa | 12.56         | 7.20    | 1.00         | 16.83    |
| Tanzania     | 0.75          | 0.42    | 0.06         | 1.00     |

|                                             | <b>E-MOTIVE<br/>(N = 48,678)</b> | <b>Usual care<br/>(N = 50,043)</b> |
|---------------------------------------------|----------------------------------|------------------------------------|
| Uterine massage                             | 5,762 (11.84)                    | 4,085 (8.16)                       |
| Oxytocin use                                | 5,864 (12.05)                    | 4,283 (8.56)                       |
| Tranexamic acid use                         | 5,796 (11.91)                    | 1,965 (3.93)                       |
| Intravenous fluids use                      | 5,851 (12.02)                    | 4,163 (8.32)                       |
| Examination of the genital tract            | 5,476 (11.25)                    | 3,581 (7.16)                       |
| Ergometrine use                             | 124 (0.25)                       | 75 (0.15)                          |
| Misoprostol use                             | 2,587 (5.31)                     | 2,705 (5.41)                       |
| Laparotomy                                  | 1 (0.00)                         | 3 (0.01)                           |
| Hysterectomy                                | 11 (0.02)                        | 6 (0.01)                           |
| Non-pneumatic anti-shock garment (NASG) use | 89 (0.18)                        | 38 (0.08)                          |
| Bimanual compression                        | 136 (0.28)                       | 553 (1.11)                         |
| Uterine balloon tamponade use               | 44 (0.09)                        | 57 (0.11)                          |
| Blood transfusion                           | 1,063 (2.18)                     | 1,286 (2.57)                       |
| Transfer to higher level facility           | 82 (0.17)                        | 17 (0.03)                          |
| Intensive care unit (ICU) admissions        | 7 (0.01)                         | 28 (0.06)                          |
| Duration of hospitalisation (days)*         | 1.09 (1.78)                      | 1.14 (2.06)                        |
| Duration of ICU hospitalisation (days)*     | 2.00 (2.45)                      | 1.57 (1.53)                        |

Values are number (percentage) or mean (SD)\*

Baseline data before implementation of the intervention (107,733 patients in 78 clusters) for the E-MOTIVE and usual-care groups are as follows: *Uterine massage*: E-MOTIVE: 5,074 (10.00), usual care: 4,537 (7.96); *Oxytocin use*: E-MOTIVE: 5,740 (11.32), usual care: 4,063 (8.88); *Tranexamic acid use*: E-MOTIVE: 2,246 (4.43), usual care: 1,221 (2.14); *Intravenous fluid use*: E-MOTIVE: 5,289 (10.43), usual care: 4,458 (7.82); *Examination of the genital tract*: E-MOTIVE: 4,007 (7.90), usual care: 3,786 (6.64); *Ergometrine use*: E-MOTIVE: 131 (0.26), usual care: 162 (0.28); *Misoprostol use*: E-MOTIVE: 3,286 (6.48), usual care: 3,234 (5.67); *Laparotomy*: E-MOTIVE: 3 (0.01), usual care: 3 (0.01); *Hysterectomy*: E-MOTIVE: 7 (0.01), usual care: 8 (0.01); *NASG*: E-MOTIVE: 72 (0.14), usual care: 50 (0.09); *Bimanual compression*: E-MOTIVE: 303 (0.60), usual care: 438 (0.77); *Uterine balloon tamponade*: E-MOTIVE: 23 (0.05), usual care: 56 (0.11); *Blood transfusion*: E-MOTIVE: 1,474 (2.91), usual care: 1,652 (2.90); *Transfer to higher level facility*: E-MOTIVE: 74 (0.15), usual care: 23 (0.04); *ICU admissions*: E-MOTIVE: 13 (0.03), usual care: 39 (0.07); *Duration of hospitalisation (days)\**: E-MOTIVE: 1.06 (2.31), usual care: 1.05 (1.79); *Duration of ICU hospitalisation (days)\**: E-MOTIVE: 2.00 (1.96), usual care: 2.02 (3.09).

| <b>Table A4. Mean per-patient costs (2022 USD)</b>                                                                                                                                                                                                                                                       |                                 |                                    |                                 |                  |
|----------------------------------------------------------------------------------------------------------------------------------------------------------------------------------------------------------------------------------------------------------------------------------------------------------|---------------------------------|------------------------------------|---------------------------------|------------------|
|                                                                                                                                                                                                                                                                                                          | <b>E-MOTIVE<br/>(N= 48,678)</b> | <b>Usual care<br/>(N = 50,043)</b> | <b>Adjusted<br/>Difference*</b> | <b>95% CIs**</b> |
| Calibrated blood-collection drape                                                                                                                                                                                                                                                                        | 1.518<br>(0.000)                | 0.000<br>(0.000)                   | 1.518                           | -                |
| Oxytocin                                                                                                                                                                                                                                                                                                 | 0.151<br>(0.408)                | 0.111<br>(0.357)                   | 0.034                           | 0.007 to 0.068   |
| Tranexamic acid use                                                                                                                                                                                                                                                                                      | 0.367<br>(1.00)                 | 0.126<br>(0.624)                   | 0.252                           | 0.199 to 0.305   |
| Intravenous fluids use                                                                                                                                                                                                                                                                                   | 0.216<br>(0.582)                | 0.162<br>(0.512)                   | 0.047                           | 0.007 to 0.087   |
| Misoprostol                                                                                                                                                                                                                                                                                              | 0.066<br>(0.280)                | 0.068<br>(0.282)                   | 0.004                           | -0.019 to 0.026  |
| Ergometrine                                                                                                                                                                                                                                                                                              | 0.002<br>(0.037)                | 0.001<br>(0.026)                   | 0.002                           | 0.000 to 0.003   |
| Needles and syringes                                                                                                                                                                                                                                                                                     | 0.006<br>(0.016)                | 0.005<br>(0.014)                   | 0.001                           | 0.000 to 0.002   |
| Laparotomy                                                                                                                                                                                                                                                                                               | 0.003<br>(0.672)                | 0.009<br>(1.241)                   | -0.008                          | -0.019 to 0.005  |
| Hysterectomy                                                                                                                                                                                                                                                                                             | 0.117<br>(10.875)               | 0.025<br>(2.333)                   | 0.101                           | -0.030 to 0.228  |
| Non-pneumatic anti shock garment (NASG)                                                                                                                                                                                                                                                                  | 0.002<br>(0.051)                | 0.001<br>(0.035)                   | 0.001                           | -0.001 to 0.003  |
| Bimanual compression                                                                                                                                                                                                                                                                                     | 0.003<br>(0.093)                | 0.013<br>(0.178)                   | -0.004                          | -0.012 to 0.004  |
| Uterine balloon tamponade (UBT)                                                                                                                                                                                                                                                                          | 0.002<br>(0.076)                | 0.001<br>(0.055)                   | 0.000                           | -0.001 to 0.002  |
| Blood transfusion                                                                                                                                                                                                                                                                                        | 1.348<br>(12.710)               | 1.899<br>(16.940)                  | -0.088                          | -0.585 to 0.439  |
| Non-ICU hospitalisation                                                                                                                                                                                                                                                                                  | 41.175<br>(104.015)             | 40.526<br>(118.889)                | -1.718                          | -3.823 to 0.396  |
| ICU admission                                                                                                                                                                                                                                                                                            | 0.037<br>(3.996)                | 0.439<br>(31.238)                  | 0.194                           | -0.196 to 0.689  |
| Transfer to higher level facility                                                                                                                                                                                                                                                                        | 0.089<br>(2.2017)               | 0.011<br>(0.707)                   | 0.024                           | -0.001 to 0.047  |
| Severe postpartum haemorrhage (doctor time)                                                                                                                                                                                                                                                              | 0.034<br>(0.334)                | 0.0622<br>(0.3949)                 | -0.027                          | -0.035 to -0.018 |
| <b>Mean total cost (USD)</b>                                                                                                                                                                                                                                                                             | <b>45.135<br/>(107.932)</b>     | <b>43.189<br/>(126.844)</b>        | 0.302                           | -2.312 to 2.783  |
| Values are mean (SD).                                                                                                                                                                                                                                                                                    |                                 |                                    |                                 |                  |
| *Adjusted for number of vaginal births per hospital, time period, country, the proportion of patients with a clinical primary-outcome event at each hospital and the quality of oxytocin at each hospital during the baseline phase and for clustering using random cluster and cluster-by-time effects. |                                 |                                    |                                 |                  |
| ** Confidence intervals were constructed using non-parametric permutation tests, by finding the upper and lower boundaries of the intervention effect that would lead to a two-sided P value less than the 5% level (1000 replications).                                                                 |                                 |                                    |                                 |                  |
